# Supplementary material for: Interplay between intraocular and intracranial pressure effects on the optic nerve head in vivo
Source: bioRxiv or medRxiv preprint supplement (doi:10.1101/2020.12.14.422760), 2021-10-03
Supplement: Supplementary file [file media-1.pdf]

1 **Supplemental material**

2

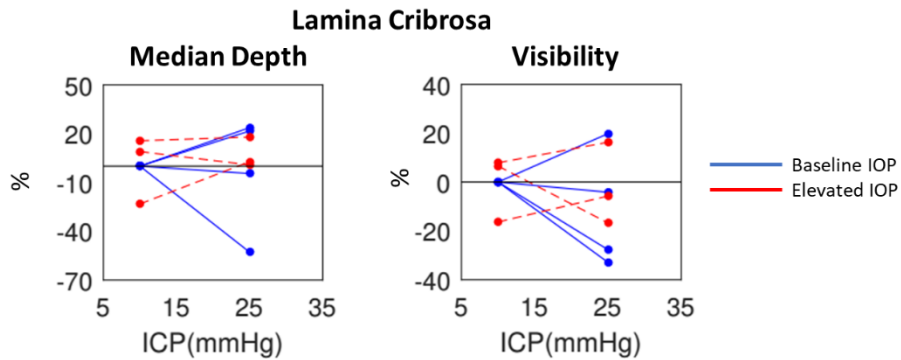

3

4

5 **Supplemental Figure 1:** Percentage changes of lamina median depth and lamina visibility with respect to  
6 baseline values due to ICP elevation at baseline IOP (blue) and elevated IOP (red). In some cases,  
7 changes in ICP have substantial effects on both lamina depth and visibility, often quite different  
8 depending on the level of IOP. Each line represents the estimate for one eye.

9
